# Supplementary material
Source: PubMed Central journal article supplement (PMC5437361)
Supplement: dex065_suppl_figure1.pdf [file dex065_suppl_figure1.pdf]

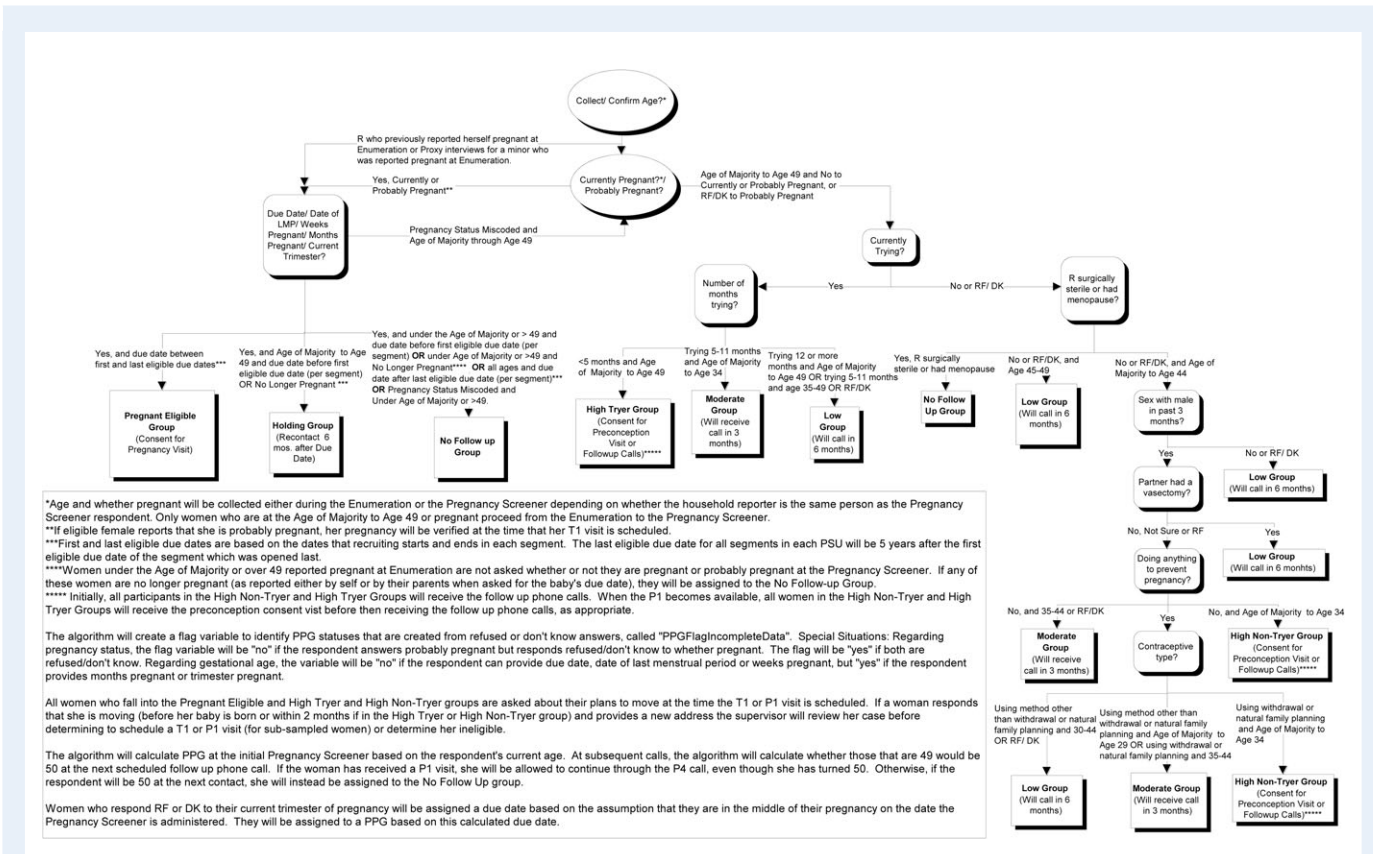

\*Age and whether pregnant will be collected either during the Enumeration or the Pregnancy Screener depending on whether the household reporter is the same person as the Pregnancy Screener respondent. Only women who are at the Age of Majority to Age 49 or pregnant proceed from the Enumeration to the Pregnancy Screener.

\*\*If eligible female reports that she is probably pregnant, her pregnancy will be verified at the time that her T1 visit is scheduled.

\*\*\*First and last eligible due dates are based on the dates that recruiting starts and ends in each segment. The last eligible due date for all segments in each PSU will be 5 years after the first eligible due date of the segment which was opened last.

\*\*\*\*Women under the Age of Majority or over 49 reported pregnant at Enumeration are not asked whether or not they are pregnant or probably pregnant at the Pregnancy Screener. If any of these women are no longer pregnant (as reported either by self or by their parents when asked for the baby's due date), they will be assigned to the No Follow-up Group.

\*\*\*\*\* Initially, all participants in the High Non-Tryer and High Tryer Groups will receive the follow up phone calls. When the P1 becomes available, all women in the High Non-Tryer and High Tryer Groups will receive the preconception consent visit before then receiving the follow up phone calls, as appropriate.

The algorithm will create a flag variable to identify PPG statuses that are created from refused or don't know answers, called "PPGflagIncompleteData". Special Situations: Regarding pregnancy status, the flag variable will be "no" if the respondent answers probably pregnant but responds refused/don't know to whether pregnant. The flag will be "yes" if both are refused/don't know. Regarding gestational age, the variable will be "no" if the respondent can provide due date, date of last menstrual period or weeks pregnant, but "yes" if the respondent provides months pregnant or trimester pregnant.

All women who fall into the Pregnant Eligible and High Tryer and High Non-Tryer groups are asked about their plans to move at the time the T1 or P1 visit is scheduled. If a woman responds that she is moving (before her baby is born or within 2 months if in the High Tryer or High Non-Tryer group) and provides a new address the supervisor will review her case before determining to schedule a T1 or P1 visit (for sub-sampled women) or determine her ineligible.

The algorithm will calculate PPG at the initial Pregnancy Screener based on the respondent's current age. At subsequent calls, the algorithm will calculate whether those that are 49 would be 50 at the next scheduled follow up phone call. If the woman has received a P1 visit, she will be allowed to continue through the P4 call, even though she has turned 50. Otherwise, if the respondent will be 50 at the next contact, she will instead be assigned to the No Follow Up group.

Women who respond RF or DK to their current trimester of pregnancy will be assigned a due date based on the assumption that they are in the middle of their pregnancy on the date the Pregnancy Screener is administered. They will be assigned to a PPG based on this calculated due date.

**Supplementary Figure S1** Initial pregnancy screening algorithm and follow-up algorithms for the National Children's Study Vanguard Centers. Initial pregnancy screener algorithm. This algorithm was used to determine if a participant was currently pregnant or probably pregnant. If not, the algorithm continued to determine whether she was sterile, and, if not, continued with additional questions about reproductive behavior related to pregnancy. Based on their responses to those questions, participants were assigned to low, moderate, high non-tryer and high tryer pregnancy probability groups (PPGs). Abbreviations: T1, first trimester study visit; P1, 1-month follow-up call; P2, 2-month follow-up call; P4, 4-month follow-up call; RF, refused; DK, do not know.
