# Supplementary material
Source: PubMed Central journal article supplement (PMC5437361)
Supplement: dex065_suppl_figure2.pdf [file dex065_suppl_figure2.pdf]

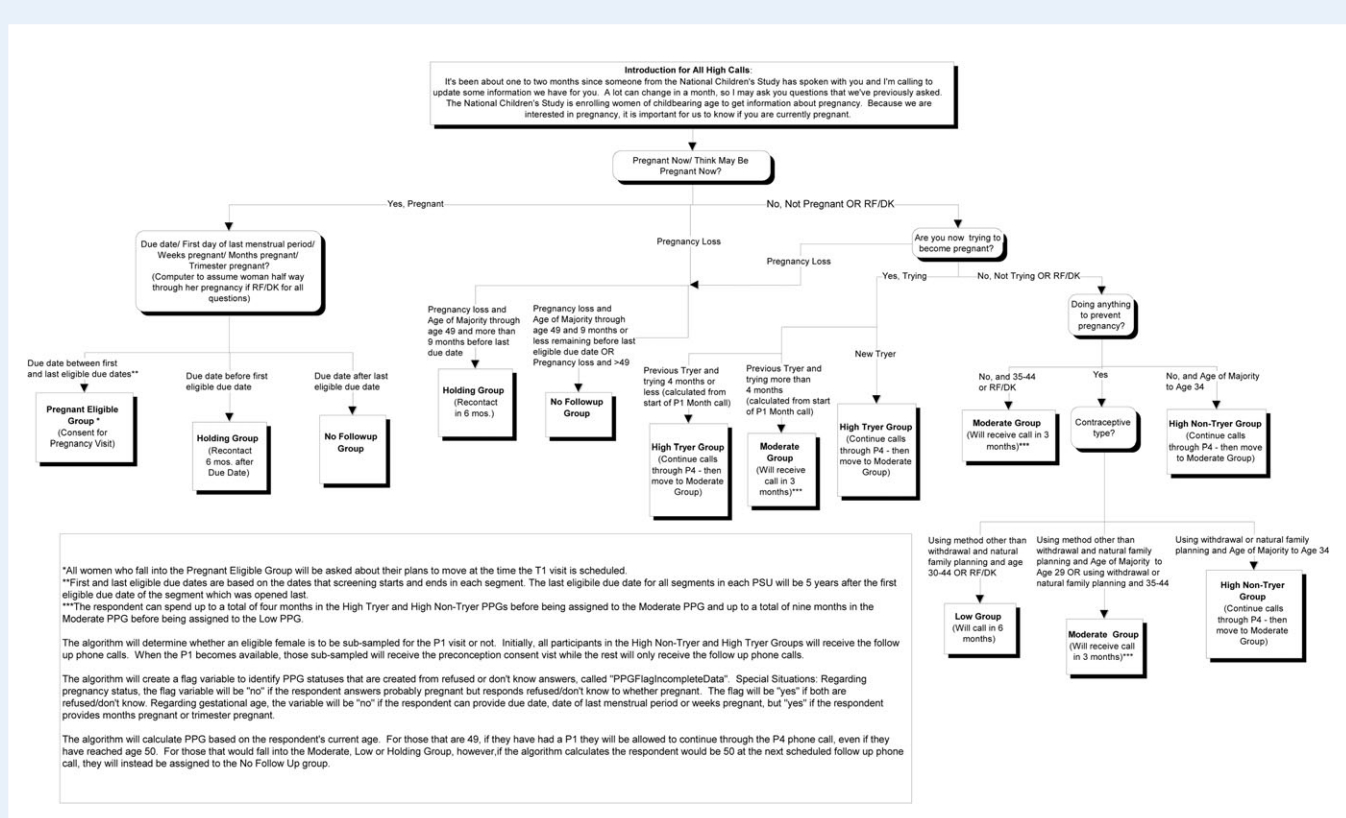

**Supplementary Figure S2** Initial pregnancy screening algorithm and follow-up algorithms for the National Children's Study Vanguard Centers. Follow-up algorithm: P1, P2 and P4 month calls. Follow-up algorithm for high non-tryer and high tryer PPG participants. High non-tryers and high tryers were contacted at Months 1, 2 and 4 after initial or interval screening, and PPG was reassessed using this algorithm. If the determination was that a participant's PPG had changed, then the next follow-up utilized the algorithm for the new PPG. Abbreviations: T1, first trimester study visit; P1, 1-month follow-up call; P2, 2-month follow-up call; P4, 4-month follow-up call; RF, refused; DK, do not know.
