# Supplementary material
Source: PubMed Central journal article supplement (PMC5437361)
Supplement: dex065_suppl_figure3.pdf [file dex065_suppl_figure3.pdf]

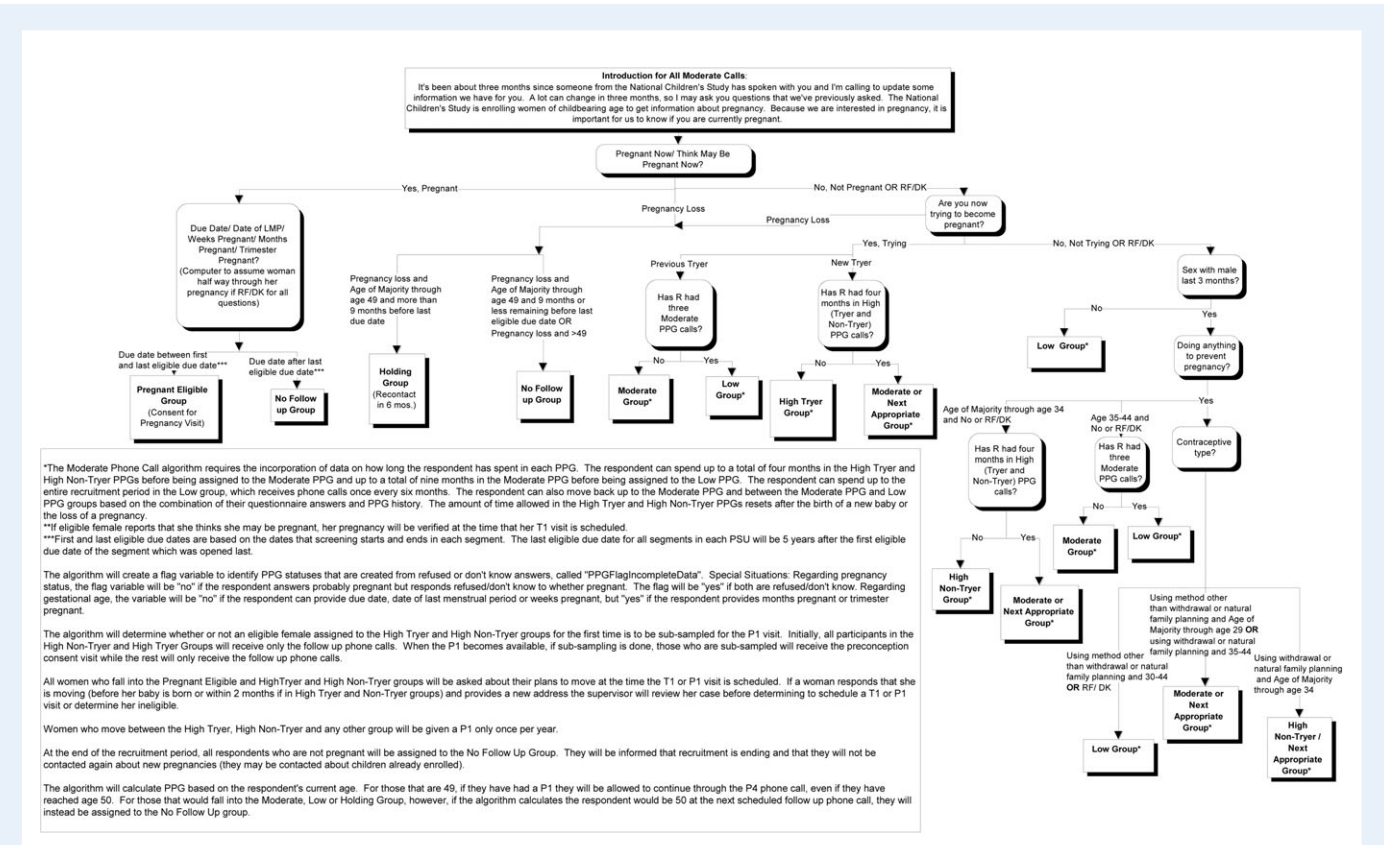

**Supplementary Figure S3** Initial pregnancy screening algorithm and follow-up algorithms for the National Children's Study Vanguard Centers. Moderate probability group call. Follow-up algorithm for moderate PPG participants. Moderate PPG participants were contacted at 3 months after initial or interval screening, and PPG was reassessed using this algorithm. If the determination was that a participant's PPG had changed, then the next follow-up utilized the algorithm for the new PPG. Abbreviations: T1, first trimester study visit; P1, 1-month follow-up call; P2, 2-month follow-up call; P4, 4-month follow-up call; RF, refused; DK, do not know.
