# Supplementary material
Source: PubMed Central journal article supplement (PMC5437361)
Supplement: dex065_suppl_table1.pdf [file dex065_suppl_table1.pdf]

**Supplementary Table SI** Number (%) of women with pregnancy probability group (PPG) transitions by initial PPG (includes only women who had at least one successful follow-up contact).

| Initial PPG status | Total number with initial PPG status (%) | Number (%) of PPG transitions |              |             |           |
|--------------------|------------------------------------------|-------------------------------|--------------|-------------|-----------|
|                    |                                          | 0                             | 1            | 2           | 3 or more |
| Low                | 7504 (58.1)                              | 4825 (64.30)                  | 2495 (33.25) | 152 (2.03)  | 32 (0.42) |
| Moderate           | 3907 (30.25)                             | 1451 (37.14)                  | 1963 (50.24) | 444 (11.36) | 49 (1.26) |
| High non-tryer     | 1072 (8.30)                              | 157 (14.65)                   | 613 (57.18)  | 248 (23.13) | 54 (5.04) |
| High tryer         | 433 (3.35)                               | 44 (10.16)                    | 271 (62.59)  | 103 (23.79) | 15 (3.46) |
