# Supplementary material
Source: PubMed Central journal article supplement (PMC5437361)
Supplement: dex065_suppl_table2.pdf [file dex065_suppl_table2.pdf]

**Supplementary Table SII Transitions from initial PPG by demographic variables (includes only women who had at least one successful follow-up contact).**

| Demographic variable   | Initial PPG    | Number | Percentage with no transition | Percentage with $\geq 1$ transition |
|------------------------|----------------|--------|-------------------------------|-------------------------------------|
| Age (years)            |                |        |                               |                                     |
| <25                    | Low            | 1234   | 59.2                          | 40.8                                |
|                        | Moderate       | 1730   | 40.4                          | 59.6                                |
|                        | High non-tryer | 334    | 14.7                          | 85.3                                |
|                        | High tryer     | 71     | 14.1                          | 85.9                                |
| 25 to <30              | Low            | 447    | 51.9                          | 48.1                                |
|                        | Moderate       | 1337   | 37.5                          | 62.5                                |
|                        | High non-tryer | 342    | 15.5                          | 84.5                                |
|                        | High tryer     | 119    | 10.9                          | 89.1                                |
| 30 to <35              | Low            | 1488   | 60.6                          | 39.4                                |
|                        | Moderate       | 44     | 18.2                          | 81.8                                |
|                        | High non-tryer | 392    | 14.0                          | 86.0                                |
|                        | High tryer     | 140    | 7.9                           | 92.1                                |
| $\geq 35$              | Low            | 4309   | 68.3                          | 31.7                                |
|                        | Moderate       | 782    | 29.8                          | 70.2                                |
|                        | High non-tryer | 0      | NA                            | NA                                  |
|                        | High tryer     | 101    | 9.9                           | 90.1                                |
| Marital status         |                |        |                               |                                     |
| Currently married      | Low            | 4700   | 64.4                          | 35.6                                |
|                        | Moderate       | 1791   | 32.9                          | 67.1                                |
|                        | High non-tryer | 586    | 13.7                          | 86.4                                |
|                        | High tryer     | 344    | 7.9                           | 92.2                                |
| Not currently married* | Low            | 2737   | 64.3                          | 35.7                                |
|                        | Moderate       | 2067   | 40.2                          | 59.8                                |
|                        | High non-tryer | 477    | 15.7                          | 84.3                                |
|                        | High tryer     | 86     | 19.8                          | 80.2                                |
| Race/Ethnicity         |                |        |                               |                                     |
| White, non-Hispanic    | Low            | 5500   | 62.8                          | 37.2                                |
|                        | Moderate       | 2786   | 38.7                          | 61.3                                |
|                        | High non-tryer | 652    | 15.5                          | 84.5                                |
|                        | High tryer     | 288    | 9.7                           | 90.3                                |
| Black, non-Hispanic    | Low            | 289    | 72.0                          | 28.0                                |
|                        | Moderate       | 151    | 29.1                          | 70.9                                |
|                        | High non-tryer | 65     | 16.9                          | 83.1                                |
|                        | High tryer     | 27     | 14.8                          | 85.2                                |
| Asian, non-Hispanic    | Low            | 593    | 67.8                          | 32.2                                |
|                        | Moderate       | 227    | 32.2                          | 67.8                                |
|                        | High non-tryer | 75     | 16.0                          | 84.0                                |
|                        | High tryer     | 33     | 9.1                           | 90.9                                |
| Hispanic               | Low            | 859    | 68.0                          | 32.0                                |
|                        | Moderate       | 583    | 31.9                          | 68.1                                |
|                        | High non-tryer | 220    | 12.3                          | 87.7                                |
|                        | High tryer     | 65     | 13.9                          | 86.2                                |
| Other                  | Low            | 195    | 70.8                          | 29.2                                |
|                        | Moderate       | 116    | 36.2                          | 63.8                                |

Continued

**Supplementary Table SII** *Continued*

| <b>Demographic variable</b> | <b>Initial PPG</b> | <b>Number</b> | <b>Percentage with no transition</b> | <b>Percentage with <math>\geq 1</math> transition</b> |
|-----------------------------|--------------------|---------------|--------------------------------------|-------------------------------------------------------|
|                             | High non-tryer     | 50            | 8.0                                  | 92.0                                                  |
|                             | High tryer         | 17            | 0.0                                  | 100                                                   |

\*Includes never married, divorced, separated and widowed. Note that missing values for demographic variables are not included.
