# Supplementary material
Source: PubMed Central journal article supplement (PMC5437361)
Supplement: dex065_suppl_table3.pdf [file dex065_suppl_table3.pdf]

**Supplementary Table SIII Estimated probabilities based on absolute risk of first transitions from low PPG directly to pregnant, by race, age and marital status, from the competing risks model.**

| Race     | Age (years) | Marital status    | Cumulative probability |              |              |              |       |
|----------|-------------|-------------------|------------------------|--------------|--------------|--------------|-------|
|          |             |                   | 90 days (%)            | 180 days (%) | 270 days (%) | 365 days (%) |       |
| White    | <25         | Currently married | 0.883                  | 1.549        | 2.111        | 2.634        |       |
|          |             | Not married       | 0.159                  | 0.312        | 0.455        | 0.595        |       |
|          | ≥25, <30    | Currently married | 3.151                  | 5.012        | 6.455        | 7.723        |       |
|          |             | Not married       | 0.742                  | 1.318        | 1.809        | 2.268        |       |
|          | ≥30, <35    | Currently married | 3.222                  | 5.117        | 6.583        | 7.869        |       |
|          |             | Not married       | 0.762                  | 1.352        | 1.854        | 2.323        |       |
|          | ≥35         | Currently married | 0.557                  | 1.010        | 1.403        | 1.774        |       |
|          |             | Not married       | 0.092                  | 0.187        | 0.277        | 0.368        |       |
|          | Hispanic    | <25               | Currently married      | 1.450        | 2.453        | 3.273        | 4.020 |
|          |             |                   | Not married            | 0.288%       | 0.546        | 0.777        | 1.002 |
| ≥25, <30 |             | Currently married | 4.748                  | 7.292        | 9.203        | 10.848       |       |
|          |             | Not married       | 1.232                  | 2.109        | 2.834        | 3.499        |       |
| ≥30, <35 |             | Currently married | 4.848                  | 7.432        | 9.369        | 11.035       |       |
|          |             | Not married       | 1.264%                 | 2.160        | 3.577        |              |       |
| ≥35      |             | Currently married | 0.942                  | 1.645        | 2.236        | 2.784        |       |
|          |             | Not married       | 0.172                  | 0.336        | 0.488        | 0.637        |       |
| Black    |             | <25               | Currently married      | 0.355        | 0.664        | 0.938        | 1.202 |
|          |             |                   | Not married            | 0.054        | 0.113        | 0.171        | 0.230 |
|          | ≥25, <30    | Currently married | 1.470                  | 2.484        | 3.313        | 4.067        |       |
|          |             | Not married       | 0.293                  | 0.554        | 0.789        | 1.016        |       |
|          | ≥30, <35    | Currently married | 1.508                  | 2.543        | 3.388        | 4.156        |       |
|          |             | Not married       | 0.302                  | 0.570        | 0.811        | 1.044        |       |
|          | ≥35         | Currently married | 0.214                  | 0.413        | 0.594        | 0.772        |       |
|          |             | Not married       | 0.030                  | 0.064        | 0.099        | 0.135        |       |
|          | Asian       | <25               | Currently married      | 0.328        | 0.616        | 0.873        | 1.121 |
|          |             |                   | Not married            | 0.049        | 0.103        | 0.157        | 0.211 |
| ≥25, <30 |             | Currently married | 1.374                  | 2.333        | 3.121        | 3.840        |       |
|          |             | Not married       | 0.270                  | 0.514        | 0.733        | 0.947        |       |
| ≥30, <35 |             | Currently married | 1.409                  | 2.389        | 3.192        | 3.924        |       |
|          |             | Not married       | 0.279                  | 0.529        | 0.754        | 0.972        |       |
| ≥35      |             | Currently married | 0.197                  | 0.381        | 0.551        | 0.717        |       |
|          |             | Not married       | 0.027                  | 0.059        | 0.091        | 0.124        |       |
| Other    |             | <25               | Currently married      | 0.592        | 1.068        | 1.480        | 1.869 |
|          |             |                   | Not married            | 0.099        | 0.200        | 0.296        | 0.392 |
|          | ≥25, <30    | Currently married | 2.258                  | 3.691        | 4.829        | 5.844        |       |
|          |             | Not married       | 0.493                  | 0.901        | 1.258        | 1.596        |       |
|          | ≥30, <35    | Currently married | 2.312                  | 3.773        | 4.930        | 5.962        |       |
|          |             | Not married       | 0.508                  | 0.926        | 1.291        | 1.637        |       |
|          | ≥35         | Currently married | 0.366                  | 0.682        | 0.963        | 1.232        |       |
|          |             | Not married       | 0.056                  | 0.117        | 0.176        | 0.237        |       |
