# Supplementary material
Source: PubMed Central journal article supplement (PMC5437361)
Supplement: dex065_suppl_table4.pdf [file dex065_suppl_table4.pdf]

**Supplementary Table SIV Estimated probabilities based on absolute risk of first transitions from moderate PPG directly to pregnant, by race, age and marital status, from the competing risks model.**

| Race     | Age (years) | Marital status    | Cumulative probability |              |              |              |
|----------|-------------|-------------------|------------------------|--------------|--------------|--------------|
|          |             |                   | 90 days (%)            | 180 days (%) | 270 days (%) | 365 days (%) |
| White    | <25         | Currently married | 3.309                  | 5.507        | 7.250        | 8.799        |
|          |             | Not married       | 0.985                  | 1.820        | 2.546        | 3.230        |
|          | ≥25, <30    | Currently married | 4.106                  | 6.694        | 8.711        | 10.481       |
|          |             | Not married       | 1.276                  | 2.309        | 3.190        | 4.011        |
|          | ≥30, <35    | Currently married | 29.495                 | 38.232       | 43.674       | 47.805       |
|          |             | Not married       | 15.063                 | 21.355       | 25.655       | 29.123       |
|          | ≥35         | Currently married | 1.185                  | 2.157        | 2.991        | 3.771        |
|          |             | Not married       | 0.292                  | 0.592        | 0.873        | 1.152        |
| Hispanic | <25         | Currently married | 5.126                  | 8.178        | 10.509       | 12.530       |
|          |             | Not married       | 1.669                  | 2.951        | 4.025        | 5.013        |
|          | ≥25, <30    | Currently married | 6.250                  | 9.773        | 12.416       | 14.681       |
|          |             | Not married       | 2.123                  | 3.678        | 4.955        | 6.118        |
|          | ≥30, <35    | Currently married | 36.897                 | 46.215       | 51.800       | 55.936       |
|          |             | Not married       | 20.345                 | 27.767       | 32.649       | 36.489       |
|          | ≥35         | Currently married | 1.982                  | 3.454        | 4.670        | 5.780        |
|          |             | Not married       | 0.535                  | 1.037        | 1.491        | 1.930        |
| Black    | <25         | Currently married | 0.714                  | 1.354        | 1.921        | 2.464        |
|          |             | Not married       | 0.162                  | 0.341        | 0.516        | 0.693        |
|          | ≥25, <30    | Currently married | 0.935                  | 1.735        | 2.432        | 3.092        |
|          |             | Not married       | 0.221                  | 0.457        | 0.682        | 0.908        |
|          | ≥30, <35    | Currently married | 12.470                 | 18.082       | 22.003       | 25.210       |
|          |             | Not married       | 4.982                  | 7.971        | 10.260       | 12.248       |
|          | ≥35         | Currently married | 0.202                  | 0.421        | 0.630        | 0.841        |
|          |             | Not married       | 0.038                  | 0.087        | 0.140        | 0.195        |
| Asian    | <25         | Currently married | 2.115                  | 3.664        | 4.938        | 6.097        |
|          |             | Not married       | 0.578                  | 1.113        | 1.595        | 2.060        |
|          | ≥25, <30    | Currently married | 2.668                  | 4.529        | 6.030        | 7.380        |
|          |             | Not married       | 0.762                  | 1.437        | 2.033        | 2.602        |
|          | ≥30, <35    | Currently married | 23.196                 | 31.106       | 36.216       | 40.188       |
|          |             | Not married       | 10.988                 | 16.167       | 19.837       | 22.866       |
|          | ≥35         | Currently married | 0.704                  | 1.335        | 1.897        | 2.434        |
|          |             | Not married       | 0.159                  | 0.336        | 0.508        | 0.683        |
| Other    | <25         | Currently married | 0.793                  | 1.491        | 2.106        | 2.692        |
|          |             | Not married       | 0.183                  | 0.382        | 0.575        | 0.770        |
|          | ≥25, <30    | Currently married | 1.035                  | 1.905        | 2.658        | 3.366        |
|          |             | Not married       | 0.249                  | 0.511        | 0.758        | 1.006        |
|          | ≥30, <35    | Currently married | 13.267                 | 19.098       | 23.143       | 26.437       |
|          |             | Not married       | 5.385                  | 8.549        | 10.955       | 13.036       |
|          | ≥35         | Currently married | 0.228                  | 0.470        | 0.700        | 0.932        |
|          |             | Not married       | 0.043                  | 0.099        | 0.158        | 0.220        |
