# Supplementary material
Source: PubMed Central journal article supplement (PMC5437361)
Supplement: dex065_suppl_table5.pdf [file dex065_suppl_table5.pdf]

**Supplementary Table SV** Associations of demographic variables with probability of transition from high non-tryer directly to pregnant.

| Model                      | Demographic subgroup  | TTx* (95% CI)                                      |
|----------------------------|-----------------------|----------------------------------------------------|
| High non-tryer to pregnant | <25 years             | 1.00 (referent)                                    |
|                            | 25 to <30 years       | 1.16 (0.43,3.12)                                   |
|                            | 30 to <35 years       | 4.23 (1.36,13.18)                                  |
|                            | ≥35 years             | 1 (1,1)                                            |
|                            | Currently married     | 1.00 (referent)                                    |
|                            | Not currently married | 3.62 (1.40,9.32)                                   |
|                            | Non-Hispanic White    | 1.00 (referent)                                    |
|                            | Hispanic              | 0.62 (0.24,1.63)                                   |
|                            | Black                 | 0.25 (0.05,1.13)                                   |
|                            | Asian                 | 2.04 × 10 <sup>8</sup><br>(0, estimate not stable) |
|                            | Other                 | 0.30 (0.06,1.56)                                   |

\* TTx = Fold change in time to transition relative to reference group.
