# Supplementary material
Source: PubMed Central journal article supplement (PMC5437361)
Supplement: dex065_suppl_table6.pdf [file dex065_suppl_table6.pdf]

**Supplementary Table SVI Associations of demographic variables with probability of transition from high tryer directly to pregnant.**

| <b>Model</b>           | <b>Demographic subgroup</b> | <b>TTx* (95% CI)</b> |
|------------------------|-----------------------------|----------------------|
| High tryer to pregnant | <25 years                   | 1.00 (referent)      |
|                        | 25 to <30 years             | 0.94 (0.34,2.57)     |
|                        | 30 to <35 years             | 0.73 (0.28,1.91)     |
|                        | ≥35 years                   | 2.11 (0.72,6.17)     |
|                        | Currently married           | 1.00 (referent)      |
|                        | Not currently married       | 2.72 (1.08,6.83)     |
|                        | Non-Hispanic White          | 1.00 (referent)      |
|                        | Hispanic                    | 1.37 (0.52,3.60)     |
|                        | Black                       | 1.71 (0.40,7.26)     |
|                        | Asian                       | 2.10 (0.64,6.86)     |
|                        | Other                       | 2.57 (0.46,14.32)    |

\* TTx = Fold change in time to transition relative to reference group.
