# Supplementary material
Source: PubMed Central journal article supplement (PMC5437361)
Supplement: dex065_suppl_table9.pdf [file dex065_suppl_table9.pdf]

**Supplementary Table SIX Comparison of parameter estimates between the AFT model and the CSSH model for the transition from moderate to low.**

|                       | <b>AFT</b>  | <b>CSSH</b> | <b>Direction of signs</b> |
|-----------------------|-------------|-------------|---------------------------|
| ≥25, <30 years        |             | Significant | Consistent                |
| ≥30, <35 years        | Significant | Significant | Consistent                |
| ≥35 years             | Significant | Significant | Consistent                |
| Currently not married | Significant | Significant | Consistent                |
| Hispanic              | Significant | Significant | Consistent                |
| Black, Non-Hispanic   |             |             |                           |
| Asian, Non-Hispanic   | Significant | Significant | Consistent                |
| Other                 |             |             |                           |

## References

- Fine JP, Gray RJ. A proportional hazards model for the subdistribution of a competing risk. *J Am Stat Assoc* 1999;**94**:496–509.
- Jeong J-H, Fine JP. Parametric regression on cumulative incidence function. *Biostatistics* 2007;**8**:184–196.
- Hudgens MG, Li C, Fine JP. Parametric likelihood inference for interval censored competing risks data. *Biometrics* 2014;**70**:1–9.
- Turnbull BW. The empirical distribution function with arbitrarily grouped, censored and truncated data. *J R Stat Soc Ser B* 1976;**38**:290–295.
